# Supplementary material
Source: PubMed Central journal article supplement (PMC6364317)
Supplement: NIHMS1007937-supplement-1.pdf [file NIHMS1007937-supplement-1.pdf]

## Appendix A: Supplementary Data

**Table A1.** Bulk chemical compositions used for starting materials and bulk silicate Earth.

| <b>Wt %</b>                        | <b>CI<sup>1</sup></b> | <b>CI Fe free</b> | <b>EL Avg<sup>2</sup></b> | <b>EL Fe free</b> | <b>Bulk Earth<sup>3</sup></b> | <b>Bulk Earth Fe free</b> |
|------------------------------------|-----------------------|-------------------|---------------------------|-------------------|-------------------------------|---------------------------|
| <b>SiO<sub>2</sub></b>             | 34.00                 | 52.99             | 41.51                     | 60.55             | 34.44                         | 51.230                    |
| <b>TiO<sub>2</sub></b>             | 0.11                  | 0.17              | 0.1                       | 0.15              | 0.00                          | 0.002                     |
| <b>Al<sub>2</sub>O<sub>3</sub></b> | 2.50                  | 3.90              | 2.14                      | 3.12              | 3.00                          | 4.469                     |
| <b>Cr<sub>2</sub>O<sub>3</sub></b> | 0.00                  | 0.00              | 0.27                      | 0.39              | 0.00                          | 0.010                     |
| <b>Fe<sub>2</sub>O<sub>3</sub></b> | 0.00                  | 0.00              | 0                         | 0.00              | 0.000                         | 0.000                     |
| <b>FeO</b>                         | 36.16                 | 0.00              | 0                         | 0.00              | 0.000                         | 0.000                     |
| <b>MnO</b>                         | 0.39                  | 0.61              | 0.15                      | 0.21              | 0.00                          | 0.002                     |
| <b>MgO</b>                         | 24.58                 | 38.31             | 22.43                     | 32.72             | 25.54                         | 37.986                    |
| <b>CaO</b>                         | 2.03                  | 3.16              | 0.69                      | 1.00              | 2.39                          | 3.559                     |
| <b>Na<sub>2</sub>O</b>             | 1.04                  | 1.62              | 0.82                      | 1.19              | 0.24                          | 0.361                     |
| <b>K<sub>2</sub>O</b>              | 0.10                  | 0.16              | 0.09                      | 0.13              | 0.02                          | 0.000                     |
| <b>P<sub>2</sub>O<sub>5</sub></b>  | 0.00                  | 0.00              | 0.23                      | 0.34              |                               | 0.000                     |
| <b>H<sub>2</sub>O+</b>             | 0.00                  | 0.00              | 0.23                      | 0.35              |                               | 0.000                     |
| <b>H<sub>2</sub>O-</b>             | 0.00                  | 0.00              | 0.14                      | 0.20              |                               | 0.000                     |
| <b>Fe(m)</b>                       |                       | 0.00              | 20.21                     | 0.00              | 32.00                         | 0.000                     |
| <b>Ni</b>                          |                       | 0.00              | 1.53                      | 0.00              | 0.02                          | 0.027                     |
| <b>Co</b>                          |                       | 0.00              | 0.08                      | 0.00              |                               | 0.000                     |
| <b>FeS</b>                         | 0.00                  | 0.00              | 8.57                      | 0.00              |                               | 0.000                     |
| <b>C</b>                           | 0.00                  | 0.00              | 0.25                      | 0.36              |                               | 0.000                     |
| <b>Other</b>                       | 0.00                  | 0.00              | 0.93                      | 0.00              |                               | 0.000                     |
| <b>Total</b>                       | 100.91                | 100.91            | 100.34                    | 100.70            | 97.66                         | 97.65                     |

1. Newsom (1995); 2. Jarosewich (1990); 3. McDonough and Sun (1995)

**Table A2.** Parameters for four evaporation models as evaluated at  $t = 50$  seconds into the evaporation process.

|                                                                           | <b>Model 1:<br/>Steady-state<br/>atmosphere</b> | <b>Model 2:<br/>Larger body in<br/>protostellar gas</b> | <b>Model 3:<br/>Smaller body in<br/>protostellar gas</b> | <b>Model 4:<br/>Free<br/>evaporation</b> |
|---------------------------------------------------------------------------|-------------------------------------------------|---------------------------------------------------------|----------------------------------------------------------|------------------------------------------|
| Melt Radius (km)                                                          | 700                                             | 700                                                     | 50                                                       | 50                                       |
| $PH_2$ (far field) bar                                                    | 1.000E-12                                       | 1.000E-04                                               | 1.000E-04                                                | 1.00E-12                                 |
| $P$ total (far field) bar                                                 | 1.000E-08                                       | 1.083E-04                                               | 1.040E-04                                                | 1.04E-11                                 |
| T (K)                                                                     | 2000                                            | 2000                                                    | 2000                                                     | 2000                                     |
| $ds/dt$ (cm/s)                                                            | 6.801E-07                                       | 5.125E-07                                               | 5.264E-07                                                | 1.263E-05                                |
| wt%MgO                                                                    | 38.31                                           | 38.31                                                   | 38.31                                                    | 38.31                                    |
| wt%SiO <sub>2</sub>                                                       | 52.99                                           | 52.99                                                   | 52.99                                                    | 52.99                                    |
| wt%CaO                                                                    | 3.16                                            | 3.16                                                    | 3.16                                                     | 3.16                                     |
| w%Al <sub>2</sub> O <sub>3</sub>                                          | 5.54                                            | 5.54                                                    | 5.54                                                     | 5.54                                     |
| $J_{\text{evap}}^{24}\text{Mg}$ (moles cm <sup>-2</sup> s <sup>-1</sup> ) | 1.099E-07                                       | 8.317E-06                                               | 8.208E-06                                                | 1.099E-07                                |
| $J_{\text{net}}^{24}\text{Mg}$ (moles cm <sup>-2</sup> s <sup>-1</sup> )  | 6.091E-09                                       | 4.483E-09                                               | 4.553E-09                                                | 1.084E-07                                |
| PMg saturation (bar)                                                      | 1.833E-05                                       | 1.388E-03                                               | 1.370E-03                                                | 1.833E-05                                |
| PMg (bar) adjacent surface                                                | 1.732E-05                                       | 1.387E-03                                               | 1.369E-03                                                | 2.502E-07                                |
| Saturation                                                                | 0.94457                                         | 0.99946                                                 | 0.99945                                                  | 0.01365                                  |
| $J_{\text{evap}}^{28}\text{Si}$ (moles cm <sup>-2</sup> s <sup>-1</sup> ) | 5.226E-07                                       | 3.956E-05                                               | 3.956E-05                                                | 5.226E-07                                |
| $J_{\text{net}}^{28}\text{Si}$ (moles cm <sup>-2</sup> s <sup>-1</sup> )  | 2.769E-08                                       | 2.070E-08                                               | 2.124E-08                                                | 5.124E-07                                |
| PSiO saturation (bar)                                                     | 1.181E-04                                       | 8.940E-03                                               | 8.938E-03                                                | 1.181E-04                                |
| PSiO (bar) adjacent surface                                               | 1.118E-04                                       | 8.935E-03                                               | 8.933E-03                                                | 2.302E-06                                |
| Saturation                                                                | 0.94701                                         | 0.99948                                                 | 0.99946                                                  | 0.01950                                  |
| $J_{\text{Ca}}$ (moles cm <sup>-2</sup> s <sup>-1</sup> )                 | 2.761E-12                                       | 2.386E-12                                               | 7.420E-10                                                | 1.781E-08                                |
| $J_{\text{Al total}}$ (moles cm <sup>-2</sup> s <sup>-1</sup> )           | 1.761E-20                                       | 1.960E-24                                               | 1.431E-09                                                | 3.435E-08                                |
| Total gas flux (moles cm <sup>-2</sup> s <sup>-1</sup> )                  | 2.909E-08                                       | 2.518E-08                                               | 2.587E-08                                                | 6.208E-07                                |
| $J^{24}\text{Mg}/J^{24}\text{Mg}_{\text{congruent}}$                      | 0.37272                                         | 0.36803                                                 | 0.36877                                                  | 0.36083                                  |
| $J^{28}\text{Si}/J^{28}\text{Si}_{\text{congruent}}$                      | 1.82470                                         | 1.82970                                                 | 1.82890                                                  | 1.83750                                  |
| $J_{\text{Ca}}/J_{\text{Ca}_{\text{congruent}}}$                          | 0.00330                                         | 0.00330                                                 | 0.00330                                                  | 0.00344                                  |
| $J_{\text{Al total}}/J_{\text{Al total, congruent}}$                      | 1.092E-11                                       | 1.407E-15                                               | 2.050E-14                                                | 2.295E-07                                |
| $\alpha_{\text{eq}}$ (melt/vapor) <sup>25</sup> Mg/ <sup>24</sup> Mg      | 1.000274                                        | 1.000274                                                | 1.000274                                                 | 1.000274                                 |
| $\alpha_{\text{evap}}$ (vapor/melt) <sup>25</sup> Mg/ <sup>24</sup> Mg    | 0.986900                                        | 0.986900                                                | 0.986900                                                 | 0.986900                                 |
| $\alpha_{\text{net}}$ (vapor/melt) <sup>25</sup> Mg/ <sup>24</sup> Mg     | 0.999106                                        | 0.999719                                                | 0.999719                                                 | 0.987073                                 |
| $\alpha_{\text{eq}}$ (melt/vapor) <sup>29</sup> Si/ <sup>28</sup> Si      | 1.000617                                        | 1.000617                                                | 1.000617                                                 | 1.000617                                 |
| $\alpha_{\text{evap}}$ (vapor/melt) <sup>29</sup> Si/ <sup>28</sup> Si    | 0.989800                                        | 0.989800                                                | 0.989800                                                 | 0.989800                                 |
| $\alpha_{\text{net}}$ (vapor/melt) <sup>29</sup> Si/ <sup>28</sup> Si     | 0.998871                                        | 0.999379                                                | 0.999378                                                 | 0.989985                                 |

|                                                           |            |          |          |            |
|-----------------------------------------------------------|------------|----------|----------|------------|
| D <sup>24</sup> Mg gas (cm <sup>2</sup> s <sup>-1</sup> ) | 3.6015E+08 | 34585.07 | 36015.02 | 3.6015E+11 |
| D <sup>28</sup> Si gas (cm <sup>2</sup> s <sup>-1</sup> ) | 1.8504E+08 | 17771.53 | 18506.30 | 1.8506E+11 |
